# Supplementary material
Source: PubMed Central journal article supplement (PMC3434811)
Supplement: supp_125.12.2995_JCS103093.pdf [file supp_125.12.2995_JCS103093.pdf]

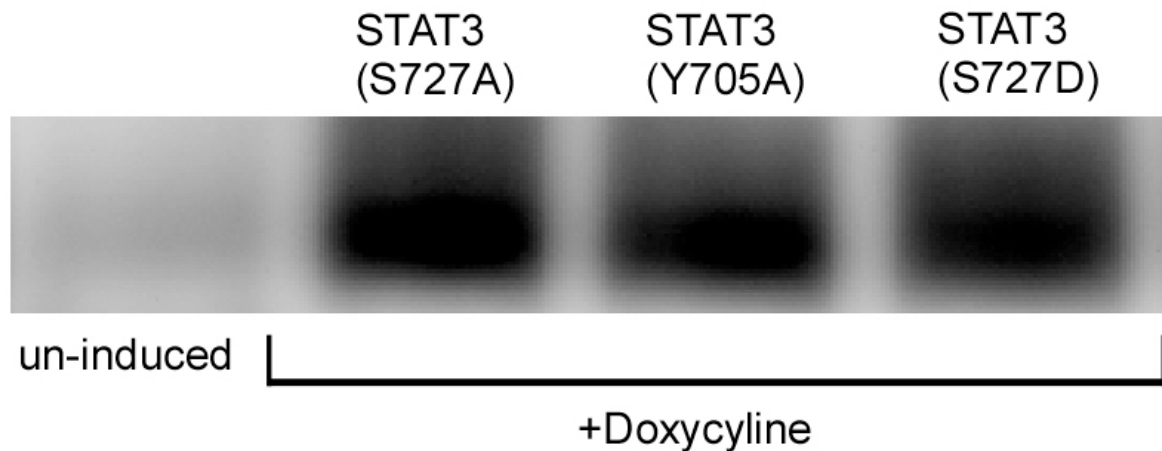

### Supplemental Figure #1

L929 cells were established which expressed STAT3(S727A) or STAT3(Y705A) under an doxycycline inducible promoter. Expression of STAT3 mutants was maximal at 24 hours following addition of 1 $\mu$ g/ml of doxycycline. The cells were harvested and the levels of STAT3(S727A) or STAT3(Y705A) were determined by western blotting with anti-flag antibody. The blots were then stripped and re-probed with antibody against tubulin. The results are typical of three independent experiments.
